# Supplementary material for: Hybrid strengthening of cellulose nanocrystal-based solvent co-cross linked flexible organohydrogels with fast self-healing, diverse adhesive nature, and anti-freezing behavior for advanced human health monitoring
Source: Royal Society of Chemistry journal article supplement (doi:10.1039/d5tb00008d), 2025-01-01
Supplement: d5tb00008d7.pdf [file d5tb00008d7.pdf]

# Hybrid Strengthening of Cellulose Nanocrystals Based Solvent Co-Cross Linked Flexible organohydrogels with Fast Self-healing, Diverse Adhesive Nature, and Anti-freezing Behavior for Advanced Human Health Monitoring

Muhammad Sher<sup>a</sup>, Al Nimra<sup>a</sup>, Luqman Ali Shah<sup>a\*</sup>, Jun Fu<sup>b</sup>, Hazizan Md Akil<sup>c</sup>

<sup>a</sup>*Polymer Laboratory, National Centre of Excellence in Physical Chemistry, University of Peshawar, Peshawar 25120 Pakistan*

<sup>b</sup>*Key Laboratory of Polymeric Composite and Functional Materials, School of Materials Science and Engineering, Sun Yat-sen University, Guangzhou 510275, China*

<sup>c</sup>*School of Materials and Mineral Resources Engineering, Universiti Sains Malaysia (USM), 14300 Nibong Tebal, Penang, Malaysia*

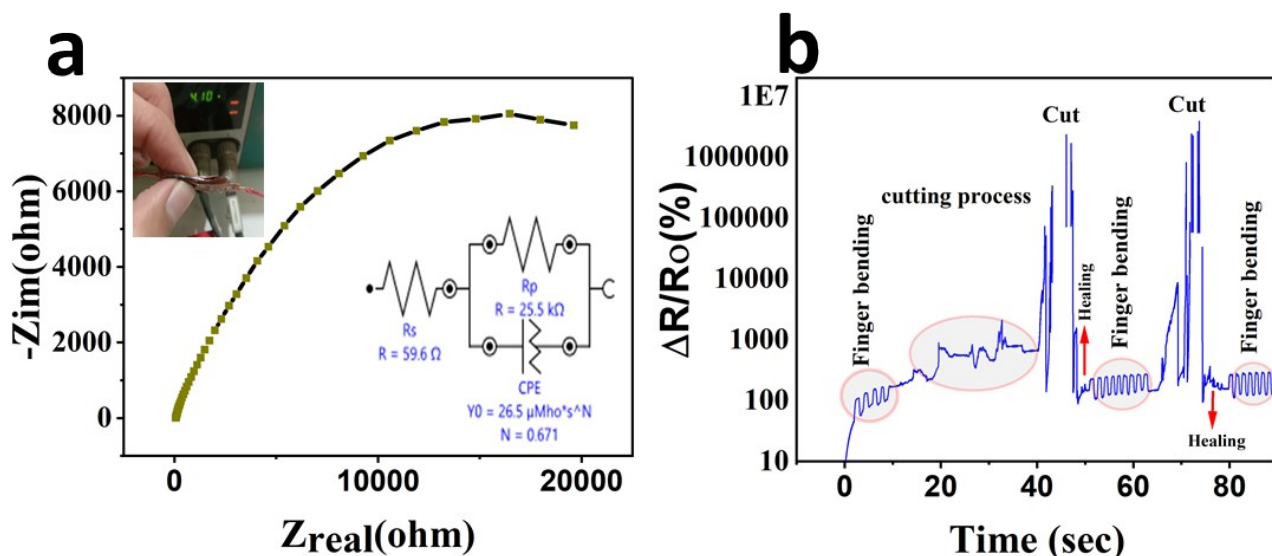

**Figure S1** (a) Electrochemical impedance spectroscopy taken eight months later, (b) Self-healing analysis during the sensor response towards bending.

To calculate the electrical conductivity from EIS data we have utilized equation A.

$$\sigma = \frac{T}{RA} \quad A$$

$\sigma$  = Conductivity (S/m)

T = Thickness of the gel (m)

R= Measured resistance ( $\Omega$ )

A= Cross-sectional area (m<sup>2</sup>) (Width × Length of the gel in contact with electrodes)

**Table S1:** The generated report of EIS data taken eight months later

| Element    | Parameter | Value             | Estimated Error (%) |
|------------|-----------|-------------------|---------------------|
| <b>Rs</b>  | <b>R</b>  | <b>59.65</b>      | <b>1.995</b>        |
| <b>Rp</b>  | <b>R</b>  | <b>25504</b>      | <b>3.994</b>        |
| <b>CPE</b> | <b>Y0</b> | <b>2.6471E-05</b> | <b>2.808</b>        |
|            | <b>N</b>  | <b>0.67074</b>    | <b>0.702</b>        |
|            | $\chi^2$  | <b>0.23351</b>    |                     |

**Table S2:** The generated report of EIS data of freshly synthesized sample S5

| Element    | Parameter | Value             | Estimated Error (%) |
|------------|-----------|-------------------|---------------------|
| <b>Rs</b>  | <b>R</b>  | <b>25.756</b>     | <b>2.245</b>        |
| <b>Rp</b>  | <b>R</b>  | <b>5108.8</b>     | <b>3.492</b>        |
| <b>CPE</b> | <b>Y0</b> | <b>8.5666E-05</b> | <b>3.374</b>        |
|            | <b>N</b>  | <b>0.62106</b>    | <b>0.872</b>        |
|            | $\chi^2$  | <b>0.23271</b>    |                     |

**Table S3:** Statistical Analysis of stress data (tensile test) of S1, S2, S3, S4, and S5

| <b>SUMMARY</b>  |              |                 |                 |                 |
|-----------------|--------------|-----------------|-----------------|-----------------|
| <i>Groups</i>   | <i>Count</i> | <i>Sum</i>      | <i>Average</i>  | <i>Variance</i> |
| <b>sample 1</b> | <b>1520</b>  | <b>763977.7</b> | <b>502.6169</b> | <b>84218.27</b> |

|                 |              |                 |                 |                 |
|-----------------|--------------|-----------------|-----------------|-----------------|
| <b>sample 2</b> | <b>15008</b> | <b>16234421</b> | <b>1081.718</b> | <b>5.28E+08</b> |
| <b>sample 3</b> | <b>13343</b> | <b>24386656</b> | <b>1827.674</b> | <b>1.21E+09</b> |
| <b>Sample 4</b> | <b>10196</b> | <b>22270535</b> | <b>2184.242</b> | <b>1.39E+09</b> |
| <b>Sample 5</b> | <b>14380</b> | <b>43473620</b> | <b>3023.2</b>   | <b>2.65E+09</b> |

| <b>ANOVA</b>               |                 |              |                 |                 |                 |                 |
|----------------------------|-----------------|--------------|-----------------|-----------------|-----------------|-----------------|
| <i>Source of Variation</i> | <i>SS</i>       | <i>Df</i>    | <i>MS</i>       | <i>F</i>        | <i>P-value</i>  | <i>F crit</i>   |
| <b>Between Groups</b>      | <b>3.18E+10</b> | <b>4</b>     | <b>7.95E+09</b> | <b>5.666915</b> | <b>0.000148</b> | <b>2.372095</b> |
| <b>Within Groups</b>       | <b>7.64E+13</b> | <b>54442</b> | <b>1.4E+09</b>  |                 |                 |                 |
| <b>Total</b>               | <b>7.64E+13</b> | <b>54446</b> |                 |                 |                 |                 |

**Table S4:** Statistical Analysis of strain data (tensile test) of S1, S2, S3, S4, and S5

| <b>SUMMARY</b>  |              |                |                 |                 |
|-----------------|--------------|----------------|-----------------|-----------------|
| <i>Groups</i>   | <i>Count</i> | <i>Sum</i>     | <i>Average</i>  | <i>Variance</i> |
| <b>Sample 1</b> | <b>1521</b>  | <b>116247</b>  | <b>76.42801</b> | <b>1328.558</b> |
| <b>Sample 2</b> | <b>15001</b> | <b>1132868</b> | <b>75.5195</b>  | <b>661.2845</b> |
| <b>Sample 3</b> | <b>13329</b> | <b>1513523</b> | <b>113.5511</b> | <b>3869.208</b> |
| <b>Sample 4</b> | <b>10181</b> | <b>2300241</b> | <b>225.9347</b> | <b>14880.74</b> |
| <b>Sample 5</b> | <b>14357</b> | <b>3521883</b> | <b>245.3077</b> | <b>23930.88</b> |

| <b>ANOVA</b>               |                  |              |                 |                 |                |                 |
|----------------------------|------------------|--------------|-----------------|-----------------|----------------|-----------------|
| <i>Source of Variation</i> | <i>SS</i>        | <i>df</i>    | <i>MS</i>       | <i>F</i>        | <i>P-value</i> | <i>F crit</i>   |
| <b>Between Groups</b>      | <b>294930534</b> | <b>4</b>     | <b>73732633</b> | <b>7179.144</b> | <b>0.0000</b>  | <b>2.372096</b> |
|                            | <b>558545067</b> | <b>54384</b> | <b>10270.39</b> |                 |                |                 |

**Within  
Groups**

|              |                  |              |
|--------------|------------------|--------------|
| <b>Total</b> | <b>853475601</b> | <b>54388</b> |
|--------------|------------------|--------------|

---

**Table S5:** Statistical Analysis of finger bending initially and five months later (comparison of Figure 8b and 8f)

**SUMMARY**

| <i>Groups</i>                      | <i>Count</i> | <i>Sum</i> | <i>Average</i> | <i>Variance</i> |
|------------------------------------|--------------|------------|----------------|-----------------|
| Finger bending of fresh sample     | 1750         | 60819.67   | 34.7541        | 137.6284        |
| Finger bending (Five months later) | 1750         | 131782.2   | 75.30412       | 341.911         |

**ANOVA**

| <i>Source of Variation</i> | <i>SS</i> | <i>df</i> | <i>MS</i> | <i>F</i> | <i>P-value</i> | <i>F crit</i> |
|----------------------------|-----------|-----------|-----------|----------|----------------|---------------|
| Between Groups             | 1438766   | 1         | 1438766   | 6000.616 | 0.0000         | 3.844119      |
| Within Groups              | 838714.5  | 3498      | 239.7697  |          |                |               |
| Total                      | 2277480   | 3499      |           |          |                |               |

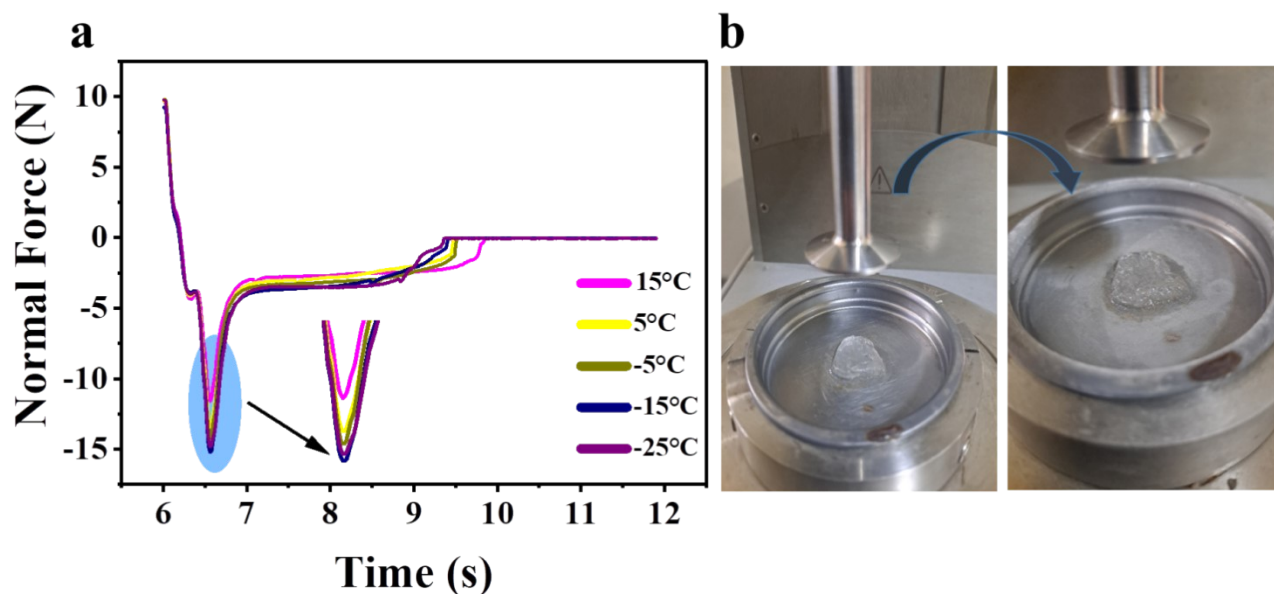

**Figure S2** a) Adhesion track test at different temperatures, (b) Photographs of organohydrogel during adhesion track test at 15°C and -25°C

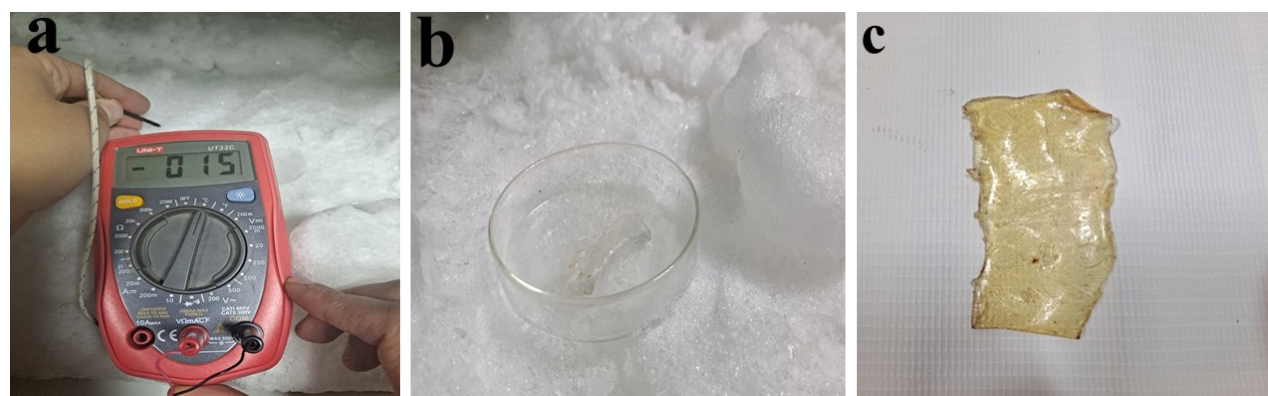

**Figure S3** (a) Photograph of freshly synthesized organohydrogel at subzero temperature, (b) Photograph of stored organohydrogels for eight months in sealed plastic bag.

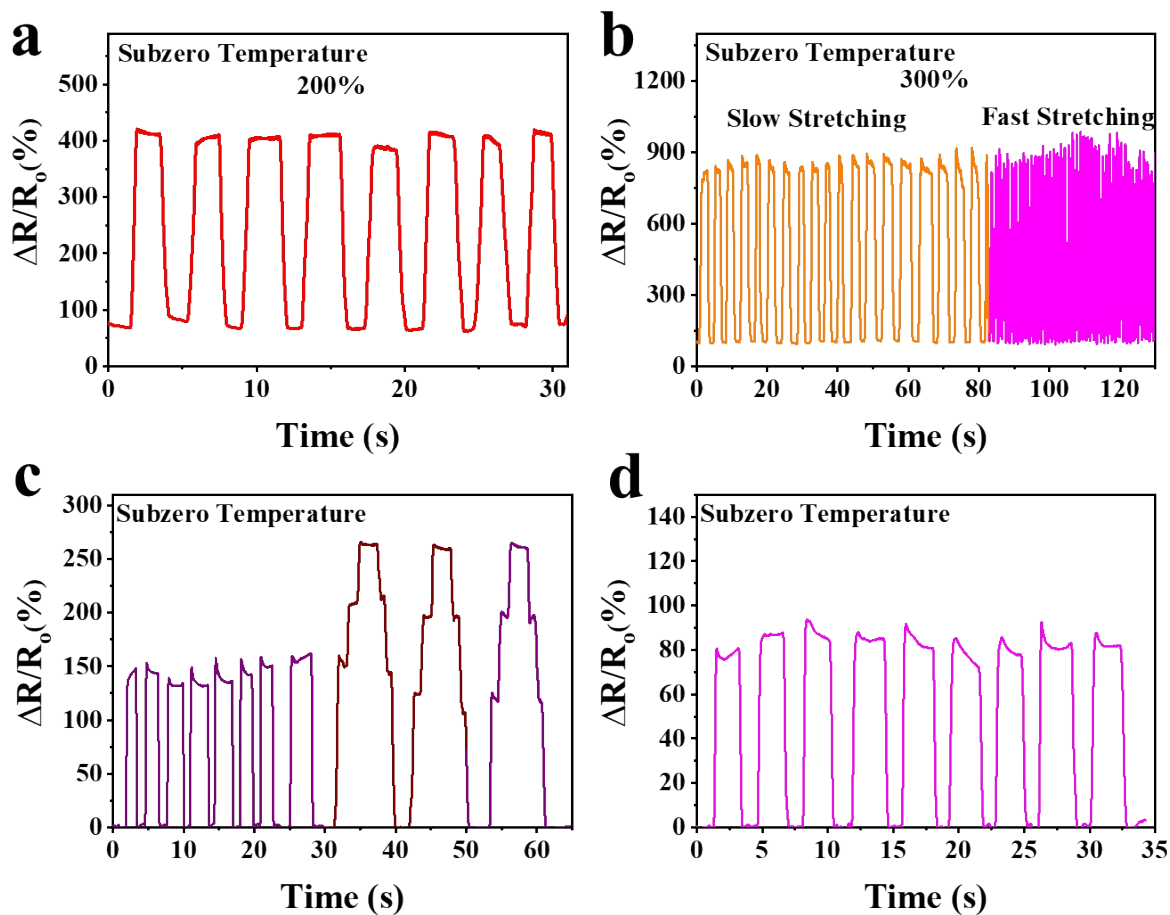

**Figure S4** Strain sensing and human motion detection occurs at subzero temperature, (a) Strain sensing at 200%, (b) Slow and fast stretching at 300%, (c) Finger bending at one and different angles (d) Wrist bending at one angle.
